# Supplementary material
Source: PubMed Central journal article supplement (PMC4311196)
Supplement: supp_tpc.114.130229_tpc130229_Supplemental.pdf [file supp_tpc.114.130229_tpc130229_Supplemental.pdf]

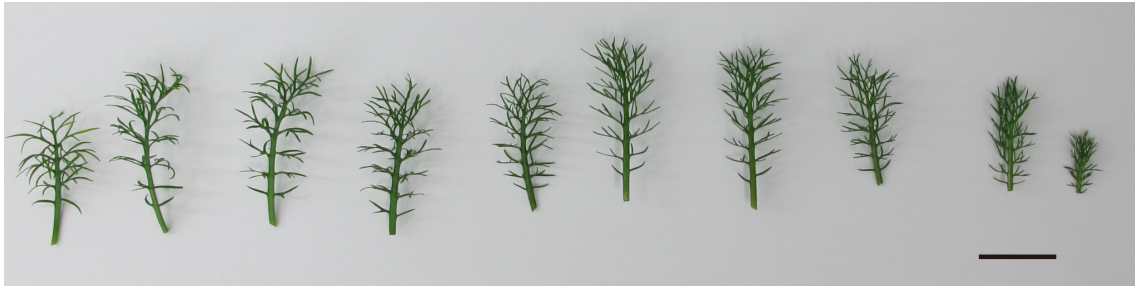

**Supplemental Figure 1.** Gross morphology of leaves at 15°C.  
Leaves from an in vitro culture plant grown at 15°C. Bar = 2 cm.

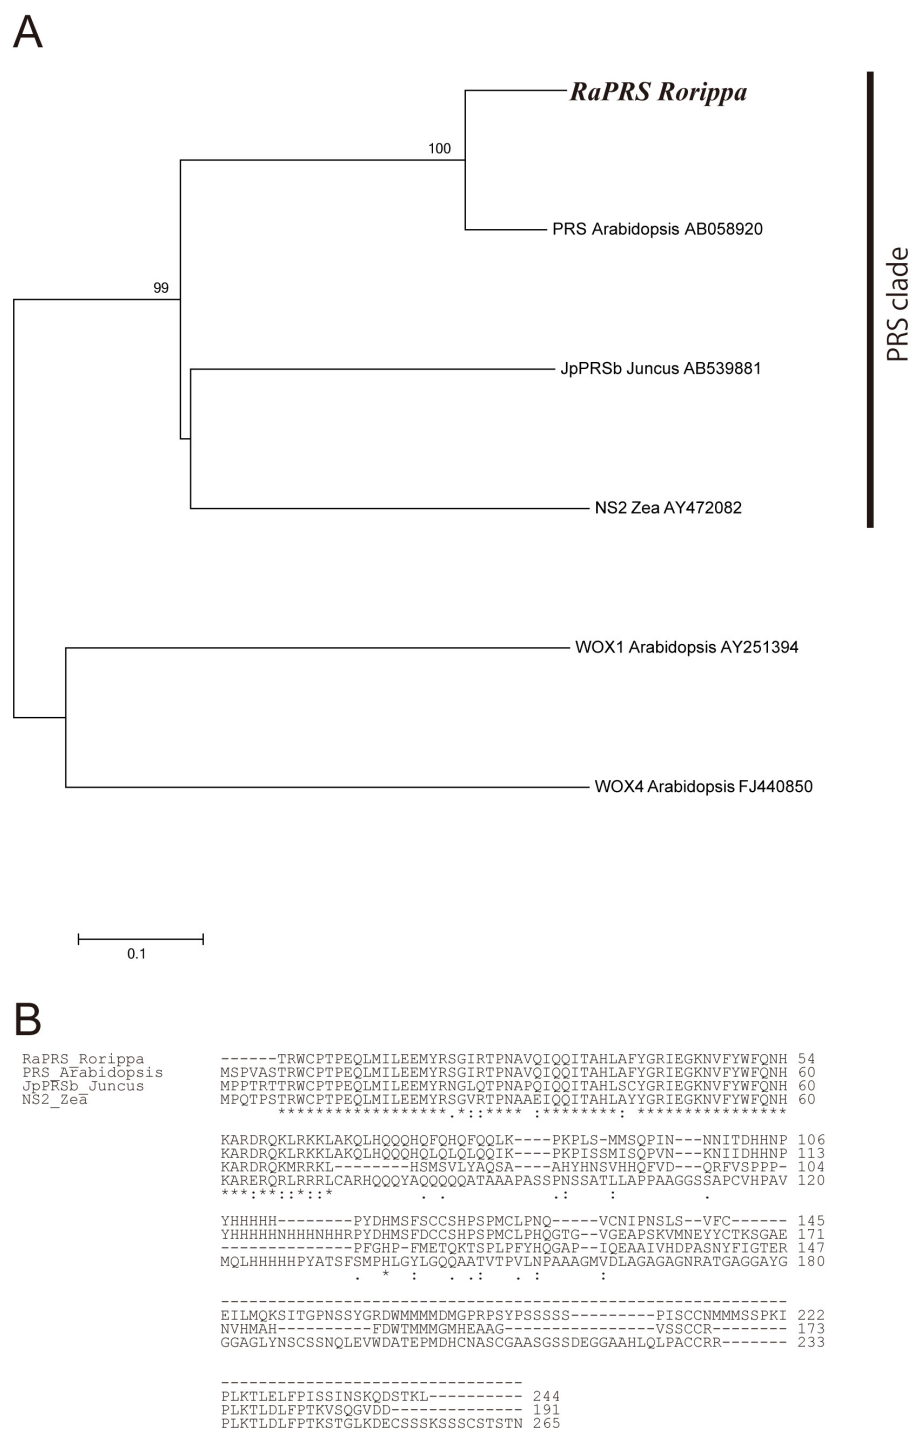

**Supplemental Figure 2.** A phylogenetic tree and alignments of *PRS* orthologs. (A) A phylogenetic tree of *PRS* orthologs resulting from Neighbor-joining method by MEGA. (B) Identical or similar amino acid residues were indicated by asterisks and colons, respectively. The bootstrap values are indicated on branches (only those more than 50% are indicated on the tree).

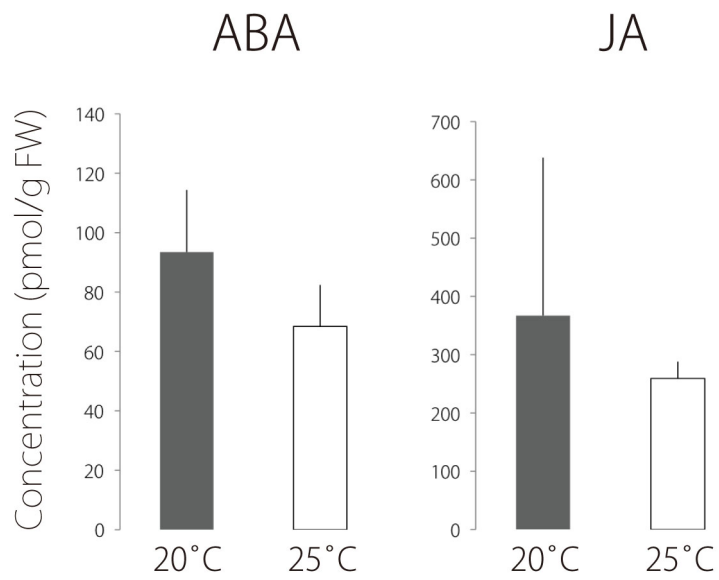

**Supplemental Figure 3.** Plant hormone profiles.

Accumulation levels of ABA and JA in leaf primordia at 20°C and 25°C.

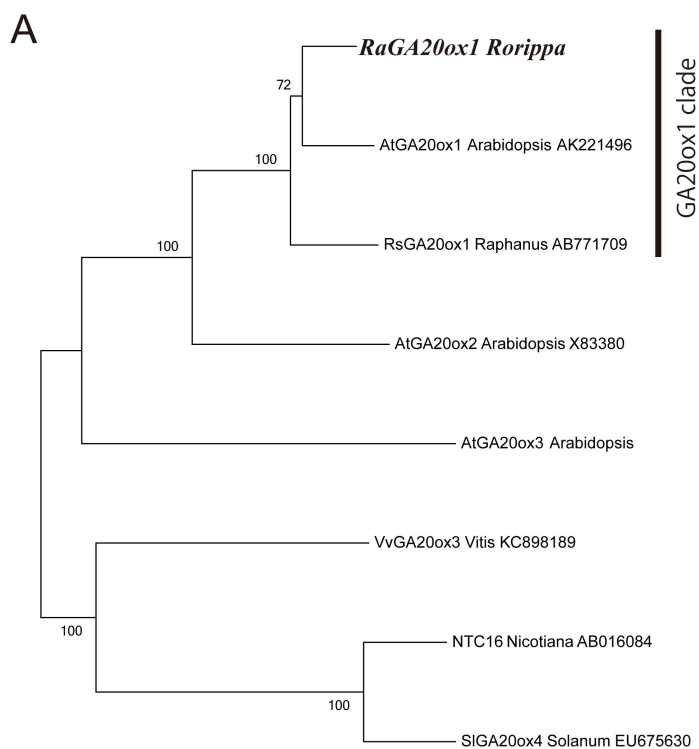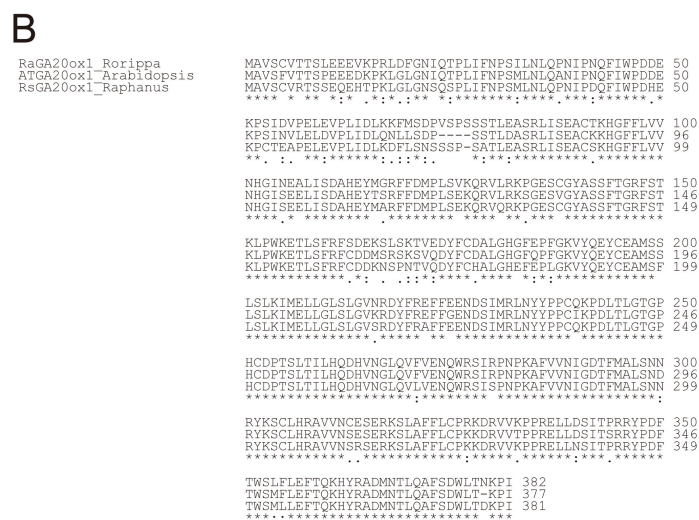

**Supplemental Figure 4.** A phylogenetic tree and alignments of *GA20ox1* orthologs.

(A) A phylogenetic tree of *GA20ox1* orthologs resulting from Neighbor-joining method by MEGA. (B) Identical or similar amino acid residues were indicated by asterisks and colons, respectively. The bootstrap values are indicated on branches (only those more than 50% are indicated on the tree).



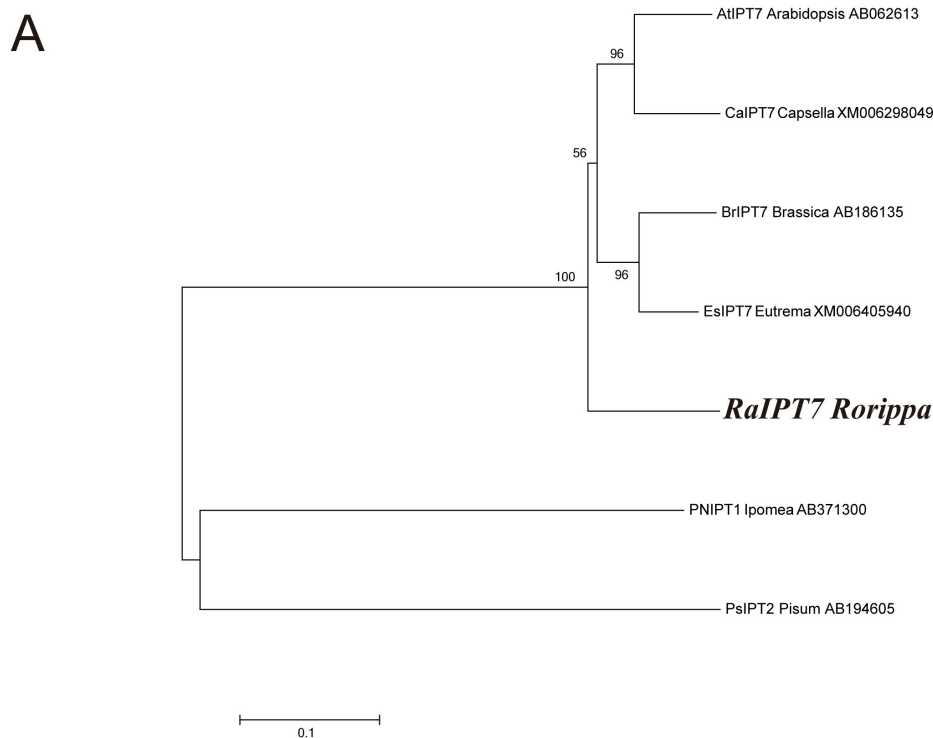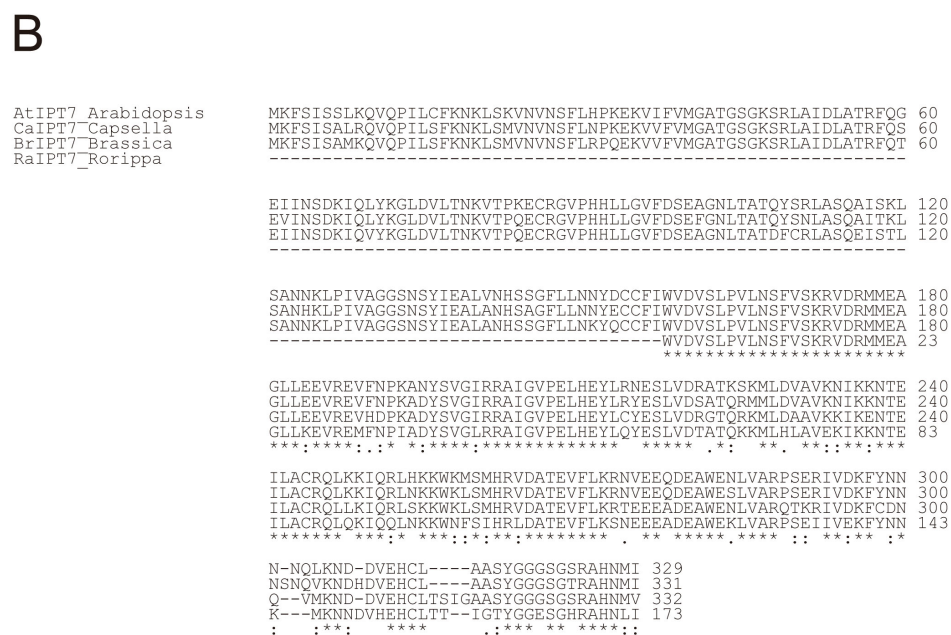

**Supplemental Figure 6.** A phylogenetic tree and alignments of *IPT7* orthologs. (A) A phylogenetic tree of *IPT7* orthologs resulting from Neighbor-joining method by MEGA. (B) Identical or similar amino acid residues were indicated by asterisks and colons, respectively. The bootstrap values are indicated on branches (only those more than 50% are indicated on the tree).

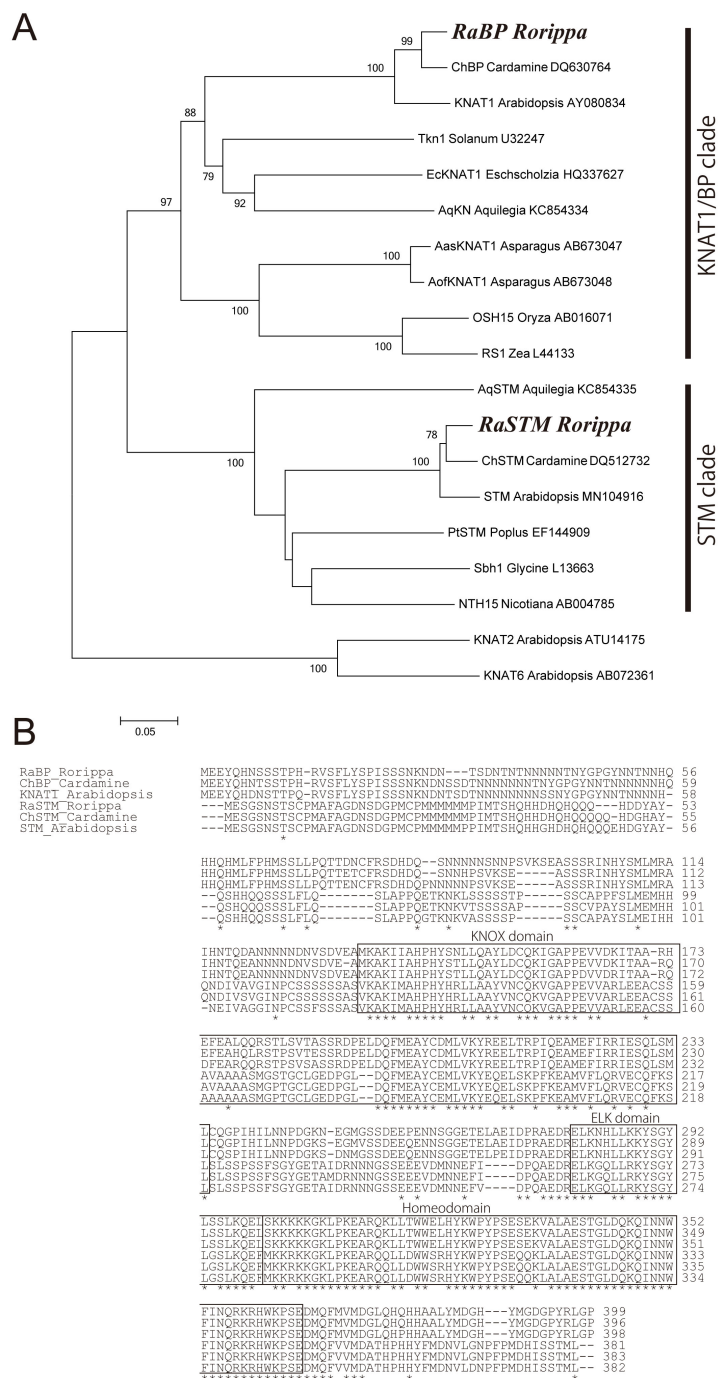

**Supplemental Figure 7. A phylogenetic tree and alignments of *KNOX1* orthologs.**

(A) A phylogenetic tree of *KNOX1* orthologs resulting from Neighbor-joining method by MEGA. (B) Identical or similar amino acid residues were indicated by asterisks and colons, respectively. The bootstrap values are indicated on branches (only those more than 50% are indicated on the tree).

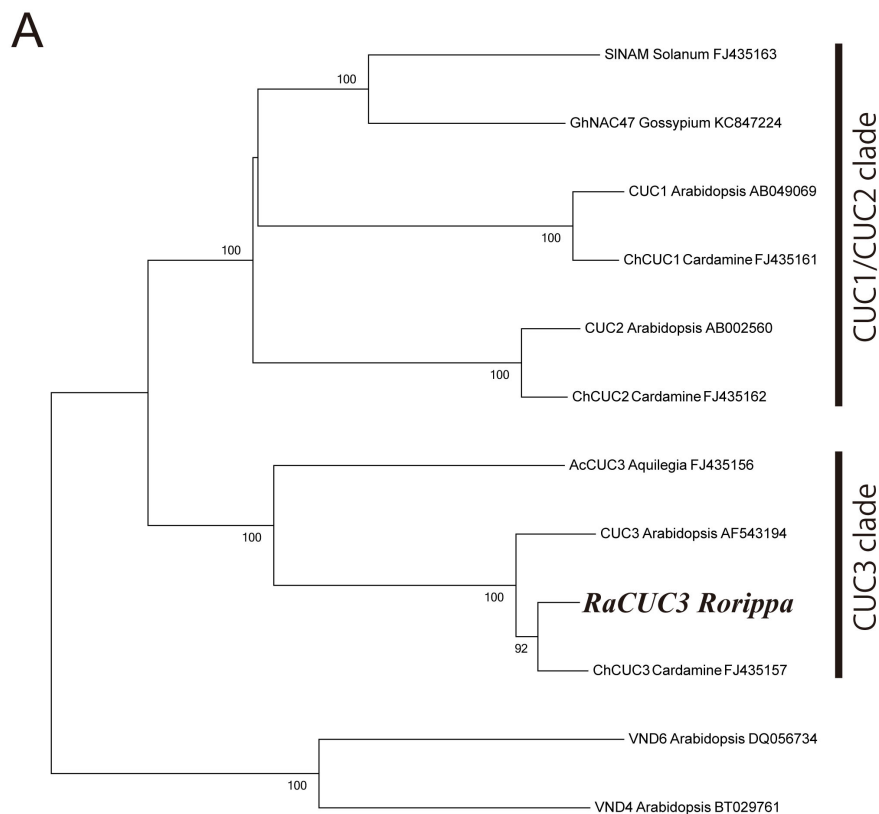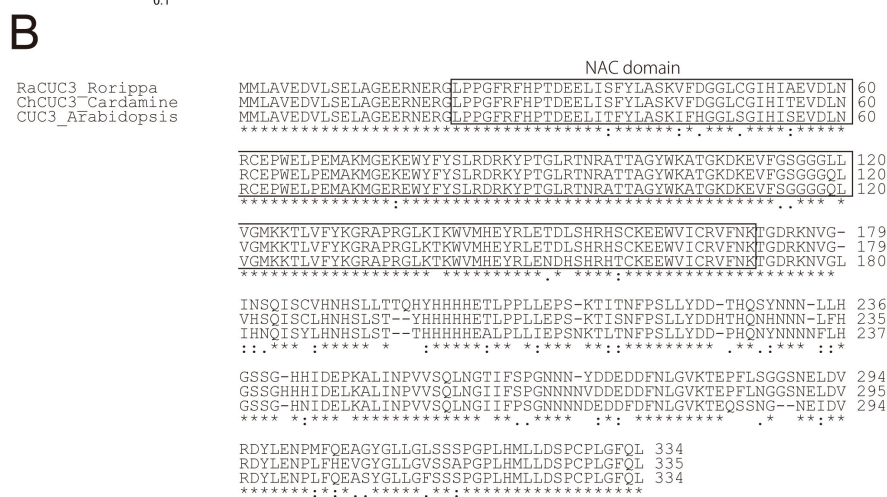

**Supplemental Figure 8.** A phylogenetic tree and alignments of *CUC* orthologs. (A) A phylogenetic tree of *CUC* orthologs resulting from Neighbor-joining method by MEGA. (B) Identical or similar amino acid residues were indicated by asterisks and colons, respectively. The bootstrap values are indicated on branches (only those more than 50% are indicated on the tree).



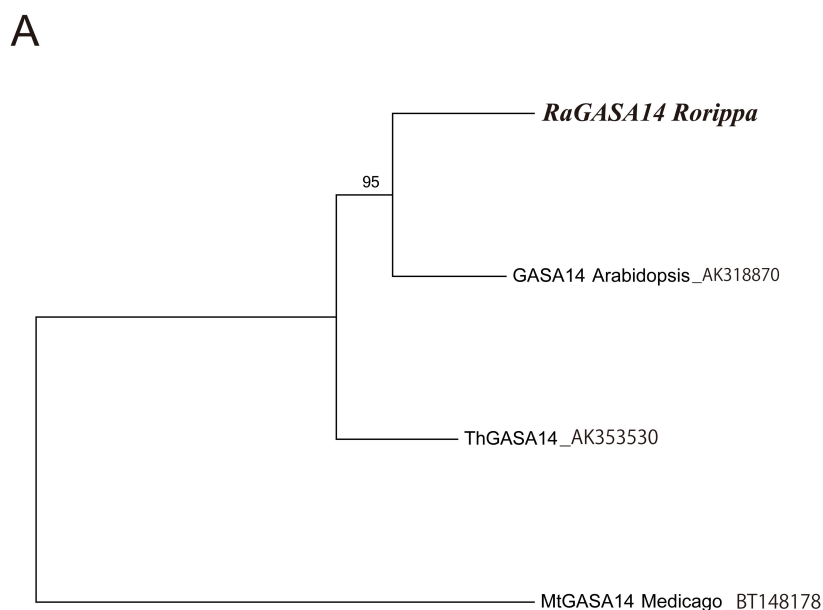

**Supplemental Figure 9.** A phylogenetic tree and alignments of *GASA14* orthologs.

(A) A phylogenetic tree of *GASA14* orthologs resulting from Neighbor-joining method by MEGA. (B) Identical or similar amino acid residues were indicated by asterisks and colons, respectively. The bootstrap values are indicated on branches (only those more than 50% are indicated on the tree).

**Supplemental Table 1.** Functional categorization by GO annotation.

| up-regulated in dissected leaf condition (630 genes) |                                        |                  |            | up-regulated in simple leaf condition (471 genes) |                                        |                  |            |
|------------------------------------------------------|----------------------------------------|------------------|------------|---------------------------------------------------|----------------------------------------|------------------|------------|
| Keyword Category                                     | Functional Category                    | Annotation Count | Gene Count | Keyword Category                                  | Functional Category                    | Annotation Count | Gene Count |
| GO Cellular Component                                | other intracellular components         | 1048             | 415        | GO Cellular Component                             | other cytoplasmic components           | 206              | 160        |
| GO Cellular Component                                | other cytoplasmic components           | 938              | 421        | GO Cellular Component                             | other intracellular components         | 160              | 104        |
| GO Cellular Component                                | chloroplast                            | 566              | 279        | GO Cellular Component                             | nucleus                                | 141              | 135        |
| GO Cellular Component                                | ribosome                               | 374              | 151        | GO Cellular Component                             | chloroplast                            | 107              | 77         |
| GO Cellular Component                                | plastid                                | 364              | 177        | GO Cellular Component                             | other membranes                        | 83               | 62         |
| GO Cellular Component                                | cytosol                                | 360              | 231        | GO Cellular Component                             | extracellular                          | 67               | 61         |
| GO Cellular Component                                | other membranes                        | 278              | 198        | GO Cellular Component                             | plasma membrane                        | 65               | 64         |
| GO Cellular Component                                | nucleus                                | 261              | 202        | GO Cellular Component                             | plastid                                | 50               | 36         |
| GO Cellular Component                                | mitochondria                           | 127              | 104        | GO Cellular Component                             | mitochondria                           | 40               | 36         |
| GO Cellular Component                                | plasma membrane                        | 112              | 110        | GO Cellular Component                             | cytosol                                | 37               | 37         |
| GO Cellular Component                                | other cellular components              | 105              | 104        | GO Cellular Component                             | other cellular components              | 28               | 27         |
| GO Cellular Component                                | extracellular                          | 58               | 55         | GO Cellular Component                             | Golgi apparatus                        | 22               | 22         |
| GO Cellular Component                                | cell wall                              | 50               | 47         | GO Cellular Component                             | cell wall                              | 22               | 19         |
| GO Cellular Component                                | Golgi apparatus                        | 14               | 12         | GO Cellular Component                             | ribosome                               | 21               | 17         |
| GO Cellular Component                                | ER                                     | 9                | 9          | GO Cellular Component                             | ER                                     | 14               | 14         |
| GO Cellular Component                                | unknown cellular components            | 4                | 4          | GO Cellular Component                             | unknown cellular components            | 12               | 12         |
| GO Molecular Function                                | other binding                          | 242              | 194        | GO Molecular Function                             | other enzyme activity                  | 196              | 107        |
| GO Molecular Function                                | nucleotide binding                     | 215              | 165        | GO Molecular Function                             | other binding                          | 165              | 118        |
| GO Molecular Function                                | other enzyme activity                  | 213              | 117        | GO Molecular Function                             | transferase activity                   | 154              | 70         |
| GO Molecular Function                                | hydrolase activity                     | 201              | 108        | GO Molecular Function                             | hydrolase activity                     | 108              | 65         |
| GO Molecular Function                                | structural molecule activity           | 149              | 147        | GO Molecular Function                             | unknown molecular functions            | 83               | 83         |
| GO Molecular Function                                | DNA or RNA binding                     | 141              | 114        | GO Molecular Function                             | protein binding                        | 75               | 66         |
| GO Molecular Function                                | protein binding                        | 95               | 84         | GO Molecular Function                             | nucleotide binding                     | 61               | 51         |
| GO Molecular Function                                | transferase activity                   | 89               | 56         | GO Molecular Function                             | transporter activity                   | 55               | 28         |
| GO Molecular Function                                | unknown molecular functions            | 54               | 54         | GO Molecular Function                             | kinase activity                        | 51               | 20         |
| GO Molecular Function                                | nucleic acid binding                   | 44               | 44         | GO Molecular Function                             | DNA or RNA binding                     | 44               | 38         |
| GO Molecular Function                                | transporter activity                   | 43               | 27         | GO Molecular Function                             | transcription factor activity          | 39               | 39         |
| GO Molecular Function                                | kinase activity                        | 17               | 10         | GO Molecular Function                             | other molecular functions              | 28               | 24         |
| GO Molecular Function                                | other molecular functions              | 12               | 11         | GO Molecular Function                             | structural molecule activity           | 12               | 11         |
| GO Molecular Function                                | transcription factor activity          | 8                | 8          | GO Molecular Function                             | nucleic acid binding                   | 6                | 6          |
| GO Molecular Function                                | receptor binding or activity           | 1                | 1          | GO Molecular Function                             | receptor binding or activity           | 0                | 0          |
| GO Biological Process                                | other cellular processes               | 1844             | 518        | GO Biological Process                             | other cellular processes               | 926              | 304        |
| GO Biological Process                                | other metabolic processes              | 1494             | 500        | GO Biological Process                             | other metabolic processes              | 725              | 298        |
| GO Biological Process                                | protein metabolism                     | 411              | 290        | GO Biological Process                             | response to stress                     | 342              | 134        |
| GO Biological Process                                | cell organization and biogenesis       | 370              | 186        | GO Biological Process                             | response to abiotic or biotic stimulus | 285              | 119        |
| GO Biological Process                                | response to abiotic or biotic stimulus | 328              | 152        | GO Biological Process                             | other biological processes             | 213              | 116        |
| GO Biological Process                                | developmental processes                | 318              | 157        | GO Biological Process                             | transport                              | 158              | 77         |
| GO Biological Process                                | response to stress                     | 299              | 150        | GO Biological Process                             | developmental processes                | 119              | 69         |
| GO Biological Process                                | other biological processes             | 269              | 189        | GO Biological Process                             | signal transduction                    | 107              | 50         |
| GO Biological Process                                | transport                              | 183              | 123        | GO Biological Process                             | protein metabolism                     | 98               | 81         |
| GO Biological Process                                | transcription,DNA-dependent            | 89               | 59         | GO Biological Process                             | cell organization and biogenesis       | 78               | 50         |
| GO Biological Process                                | electron transport or energy pathways  | 88               | 70         | GO Biological Process                             | unknown biological processes           | 69               | 69         |
| GO Biological Process                                | unknown biological processes           | 67               | 67         | GO Biological Process                             | transcription,DNA-dependent            | 58               | 46         |
| GO Biological Process                                | DNA or RNA metabolism                  | 48               | 25         | GO Biological Process                             | DNA or RNA metabolism                  | 21               | 8          |
| GO Biological Process                                | signal transduction                    | 35               | 21         | GO Biological Process                             | electron transport or energy pathways  | 18               | 16         |

**Supplemental Table 2.** List of oligonucleotide primers used in this study.

| Number | Name             | Sequence (5'-3')           |
|--------|------------------|----------------------------|
| 1      | RaGA20ox1_F      | ATTACTTCTGCGATGCGTTG       |
| 2      | RaGA20ox1_R      | GTGATTTCTCTCGCTCTCG        |
| 3      | RaGA20ox1_5RACE1 | CATGTCCCAACGCATCGCAGAAGTA  |
| 4      | RaGA20ox1_3RACE  | AAACCCGGTGAGAGTTGTGGCTACG  |
| 5      | RaGA20ox1_RT_F   | CGAGACTAATCTCTGAGGCCCTGTAC |
| 6      | RaGA20ox1_RT_R   | TGATATAAGCGCCTCGTTGATG     |
| 7      | RaGA3ox1_F1      | CGTACCTTTGGGACTTCTCG       |
| 8      | RaGA3ox1_R1      | TGACCCAACCAAGATCATCA       |
| 9      | RaGA3ox1_5RACE   | AGGGGAACCGGTGATGGTGAACCT   |
| 10     | RaGA3ox1_3RACE   | TTTACCATCACCGGTTCCCCTCTC   |
| 11     | RaGA3ox1_RT_F    | AATAAGCAAATGTGGTCTGAAGGTT  |
| 12     | RaGA3ox1_RT_R    | GGGCCAAAGTTTACGGAAGTC      |
| 13     | RaSTM_F1         | ATGGAGAGTGTTCCAACAG        |
| 14     | RaSTM1_R1        | AAGCATGGTTGAGGAGATGT       |
| 15     | RaSTM_RT_F       | TGGTGGAGCCGACACTACAA       |
| 16     | RaSTM_RT_R       | GCCAGTGCCAGCTTTTGC         |
| 17     | RaBP_F1          | TCCTGGTTACAATAATACTAA      |
| 18     | RaBP_R1          | TCAATACGACGTATAAACTC       |
| 19     | RaBP_5RACE1      | CGGAGGGGTTGTTGTTGTTGTTGG   |
| 20     | RaBP_5RACE2      | GAGGAAGAAGAGAAGTCAATATGTG  |
| 21     | RaBP_3RACE1      | CACATATGAGTTCTCTTCTCCTC    |
| 22     | RaBP_3RACE2      | CCAACAACAACAACAACCCCTCCG   |
| 23     | RaBP_RT_F        | CAAAGAGGCAAGGCAGAAGCT      |
| 24     | RaBP_RT_R        | GGATACGGCCACTTGTAATGC      |
| 25     | RaCUC3_F1        | AAGTGGGTCATGCATGAG         |
| 26     | RaCUC3_R1        | GCTTTGAGCTCGTCGATG         |
| 27     | RaCUC3_F2        | GAGTGTTCATAAAACAGG         |
| 28     | RaCUC3_R2        | CCTGATGATCCATGGAGGAG       |
| 29     | RaCUC3_F0.5      | AGTAAAAGATGATGCTTG         |
| 30     | RaCUC3_R0.5      | TCCAAGGGCCAAGATTCTA        |
| 31     | RaCUC3_RT_F      | TGACGAGCCCAAAGCCTTAAT      |
| 32     | RaCUC3_RT_R      | AGAGAAAATGGTGCCGTTAAGC     |
| 33     | RaIPT7_F1        | ttgggtcgacgtttccttac       |
| 34     | RaIPT7_R1        | tcggggtaaagtgtcacacct      |
| 35     | RaIPT7_5RACE     | AATCCTGCTTCCATCATTCG       |
| 32     | RaIPT7_RT_F      | CCGAATGATGGAAGCAGGAT       |
| 33     | RaIPT7_RT_R      | CCGAATAATCTGCTATTGGATTGA   |
| 34     | RaGASA14_5RACE1  | TCCCAGTTCTTGCTGGAGGTGGTGT  |
| 35     | RaGASA14_5RACE2  | TGGAGGTGGTGTGGTGGTTTGACC   |
| 36     | RaGASA14_RT_F    | GTGCTGCTACCGCTGCAA         |
| 37     | RaGASA14_RT-R    | CACACTTCTCCTTGTTACCGTACGT  |
| 38     | RaPRS_F          | CAACGAGGTGGTGTCCAAC        |
| 39     | RaPRS_R          | TTTGTTGTCTTTTCTTTAAAGTTTGG |
